# Supplementary material for: New roles of NO TRANSMITTING TRACT and SEEDSTICK during medial domain development in Arabidopsis fruits
Source: Oxford University Press journal article supplement (doi:10.1242/dev.172395), 2018-01-01
Supplement: dev172395supp.pdf [file dev172395supp.pdf]

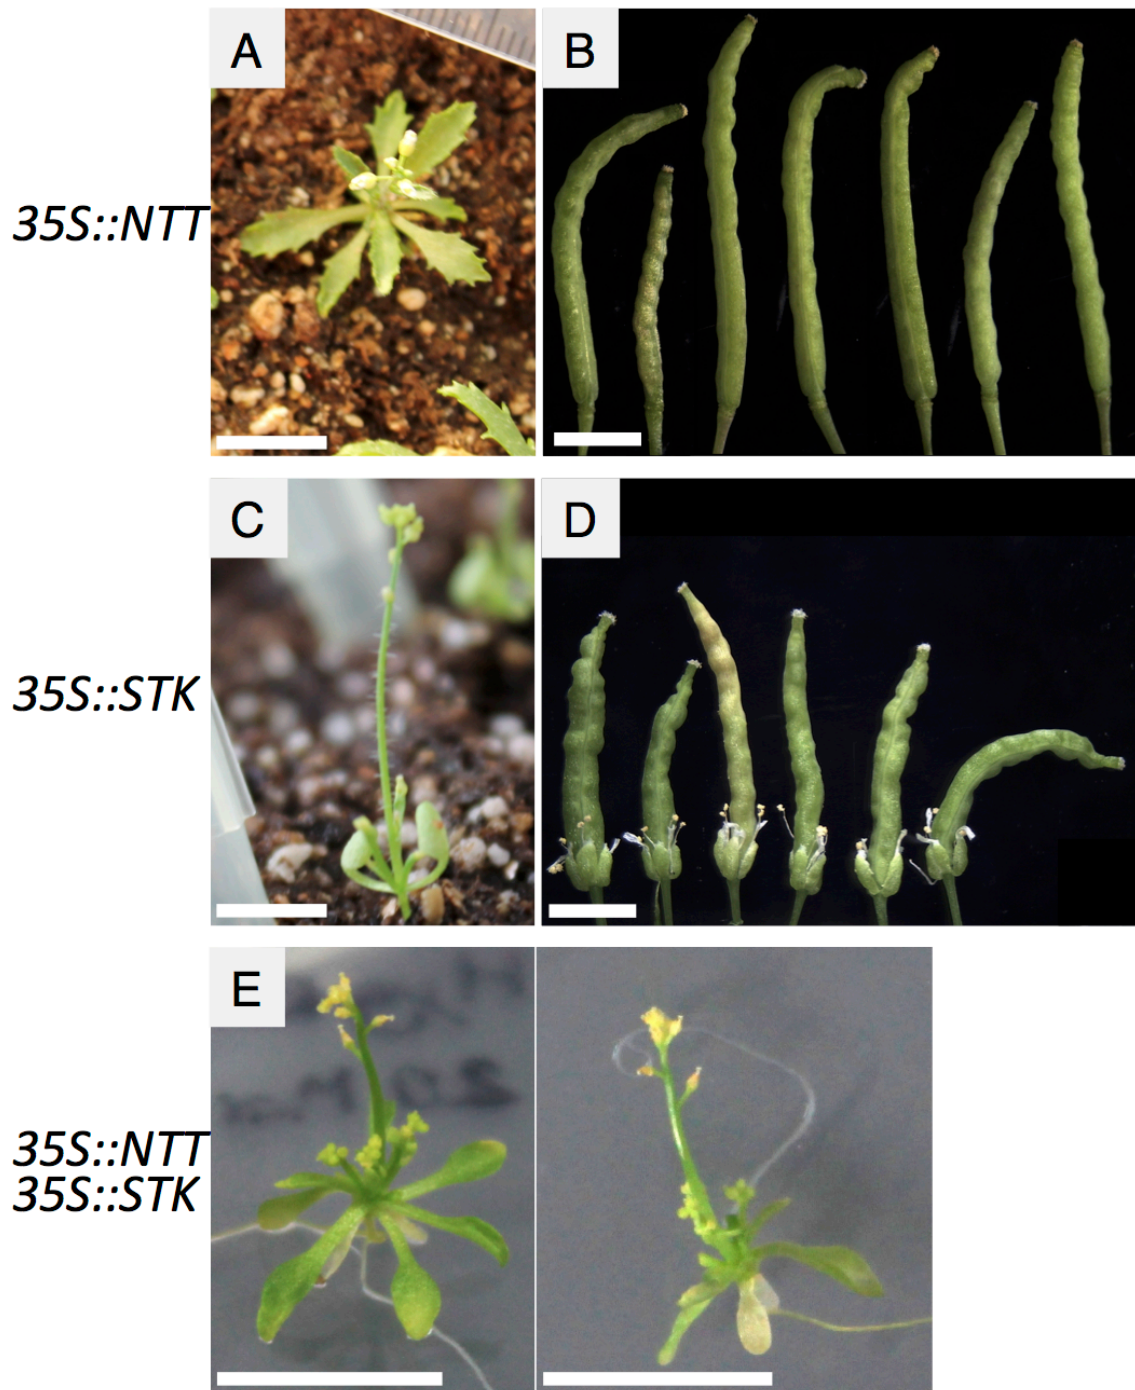

Figure S1. Phenotype of *NTT* and *STK* overexpression lines. Early flowering plants of *35S::NTT* (A) or *35S::STK* (C) overexpression lines. Fruits of the *35S::NTT* (B) and *35S::STK* (D) overexpression lines. E, Plants of the *35S::NTT 35S::STK* double overexpression line, which do not produce fruits. Scale bars = 1 cm in A, C and E; 0.2 cm in B and D.

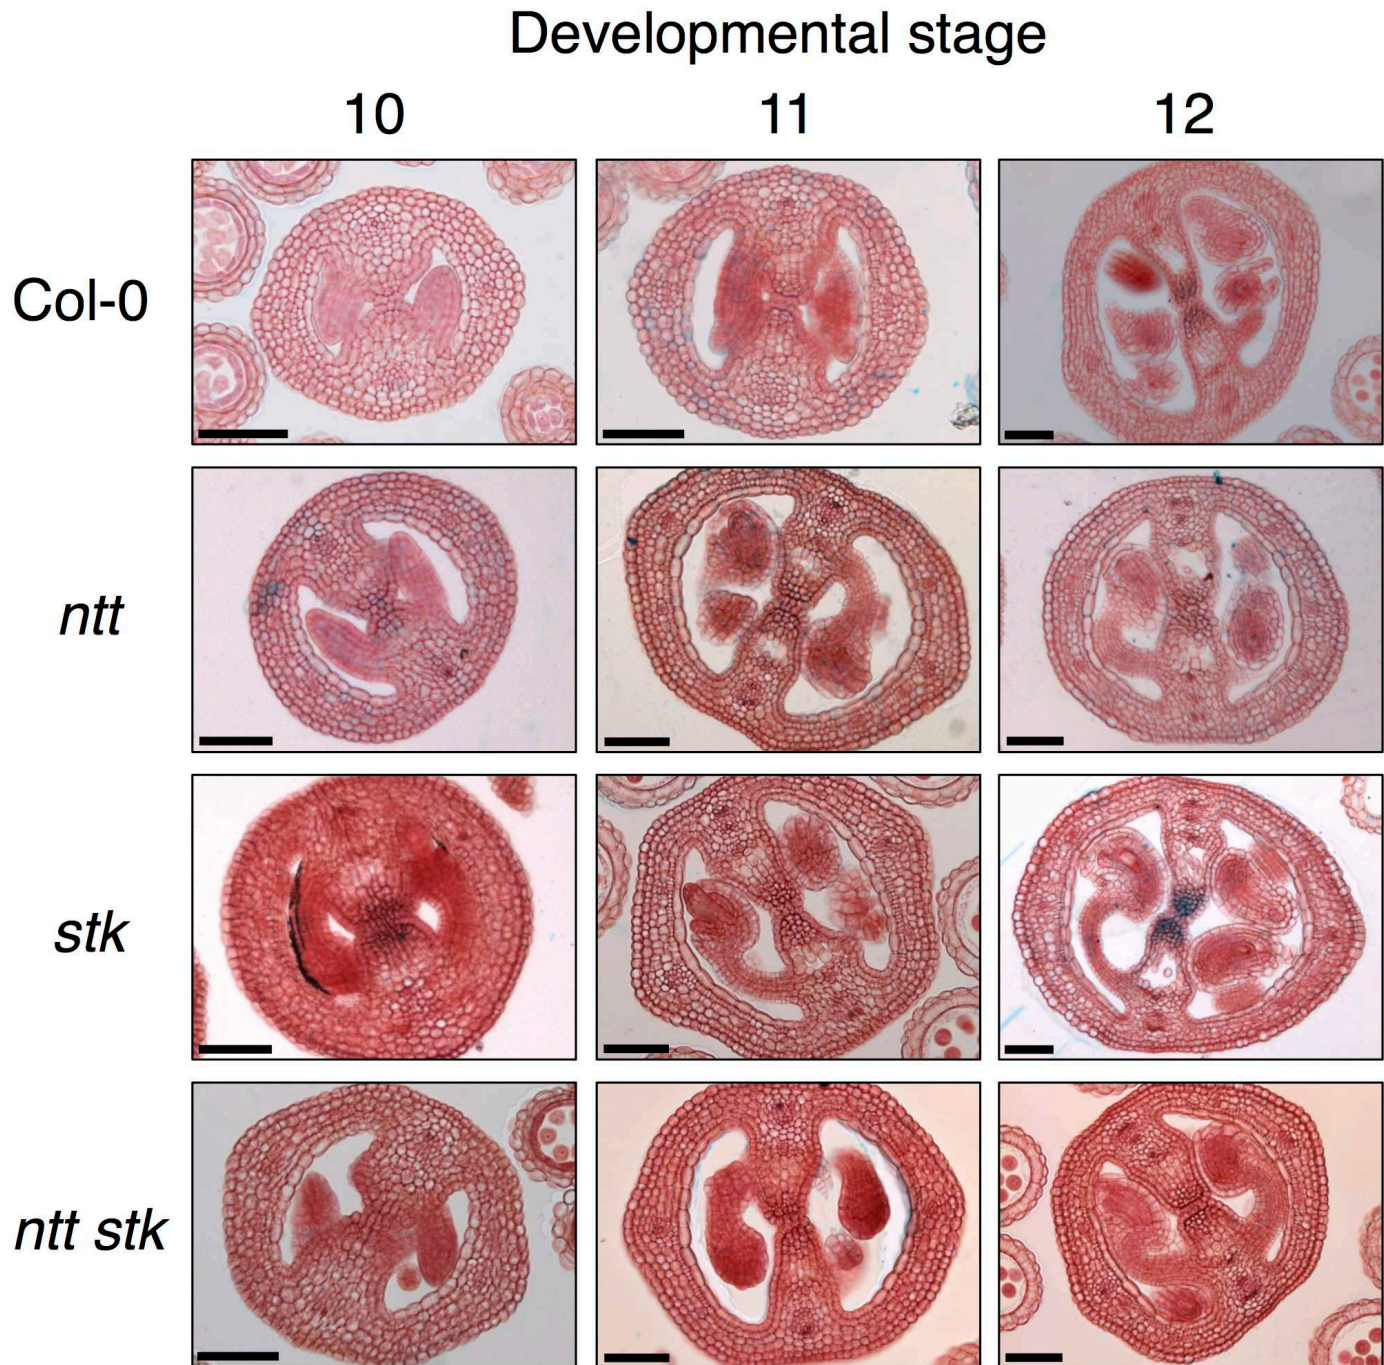

Figure S2. Transverse sections of stage 10–12 gynoecia of Col-0, *ntt*, *stk* and *ntt stk* double mutant. Scale bars = 50  $\mu$ m.



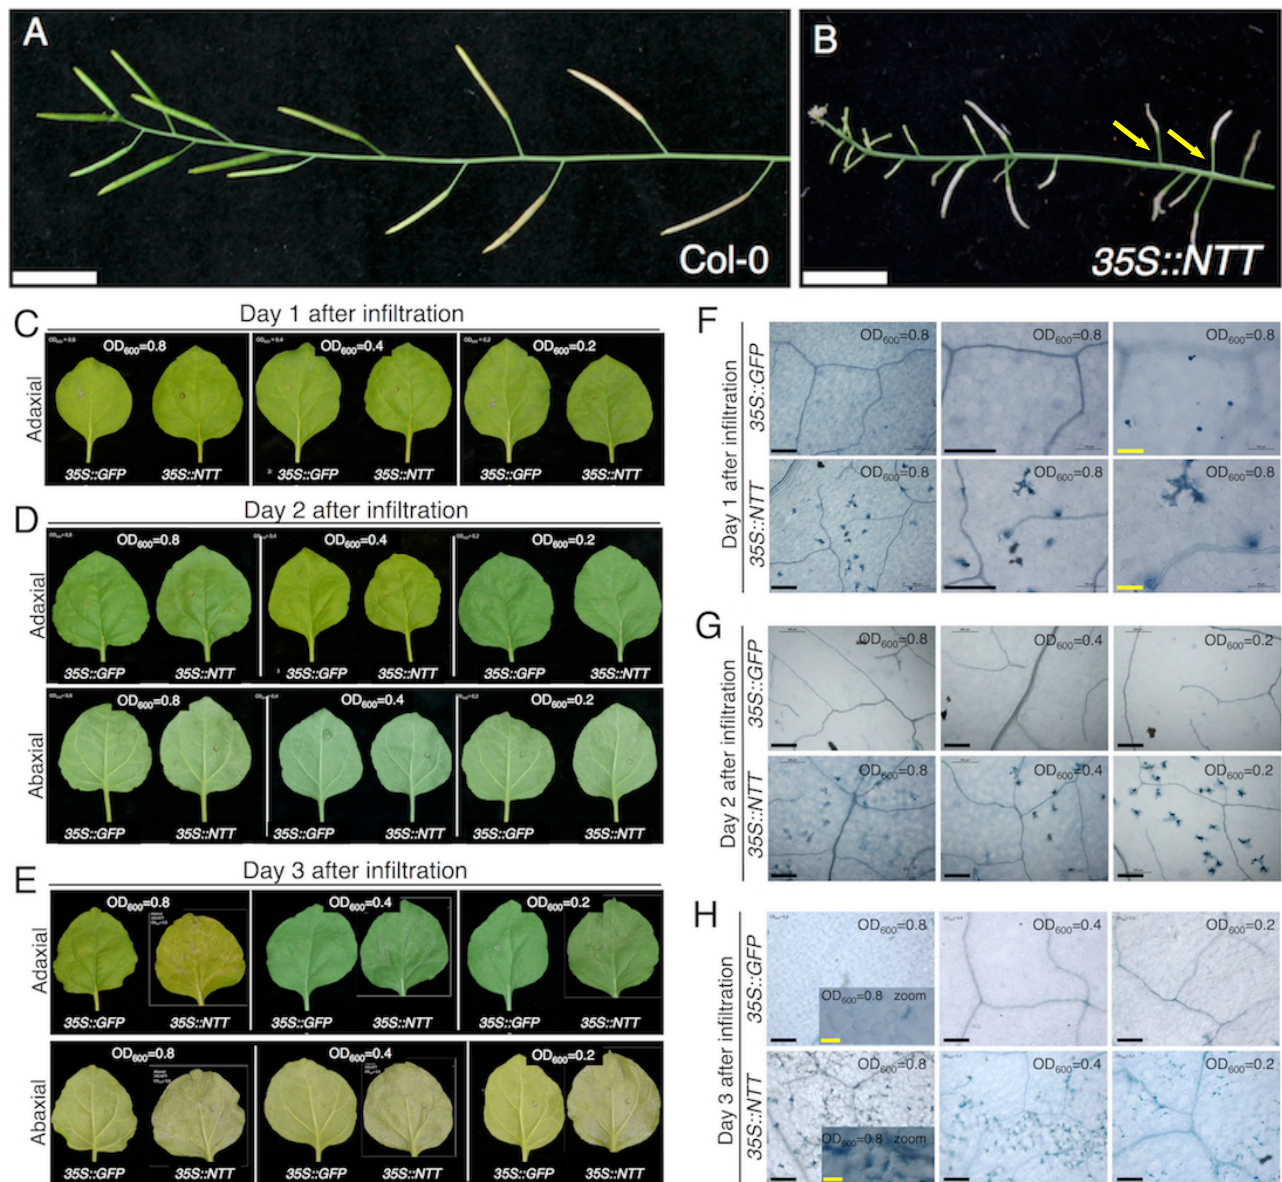

Figure S3. *NTT* accelerates senescence and promotes cell death. A-B, Fruit senescence in *Col-0* (A) and *35S::NTT*; no senescence is observed in pedicels (yellow arrows) (B). C-H, *NTT* can trigger transcriptional responses leading to cell death. Analysis of cell death caused by *NTT* or *GFP* transient expression in Nicotiana leaves. *GFP* expression was used as a negative control (note: no leaf damage was observed when *STK* alone was infiltrated in the BiFC experiment, while *NTT* alone or together *NTT* and *STK* it was observed). Overview of Nicotiana leaves 1 day (C), 2 days (D) and 3 days (E) after agro-infiltration. Detection of dead cells using the trypan blue staining in Nicotiana leaves 1 day (F), 2 days (G) and 3 days (H) after agro-infiltration. Bars represent 1 cm in A,B; in F-H, black bars represent 200  $\mu$ m and yellow bars 50  $\mu$ m.

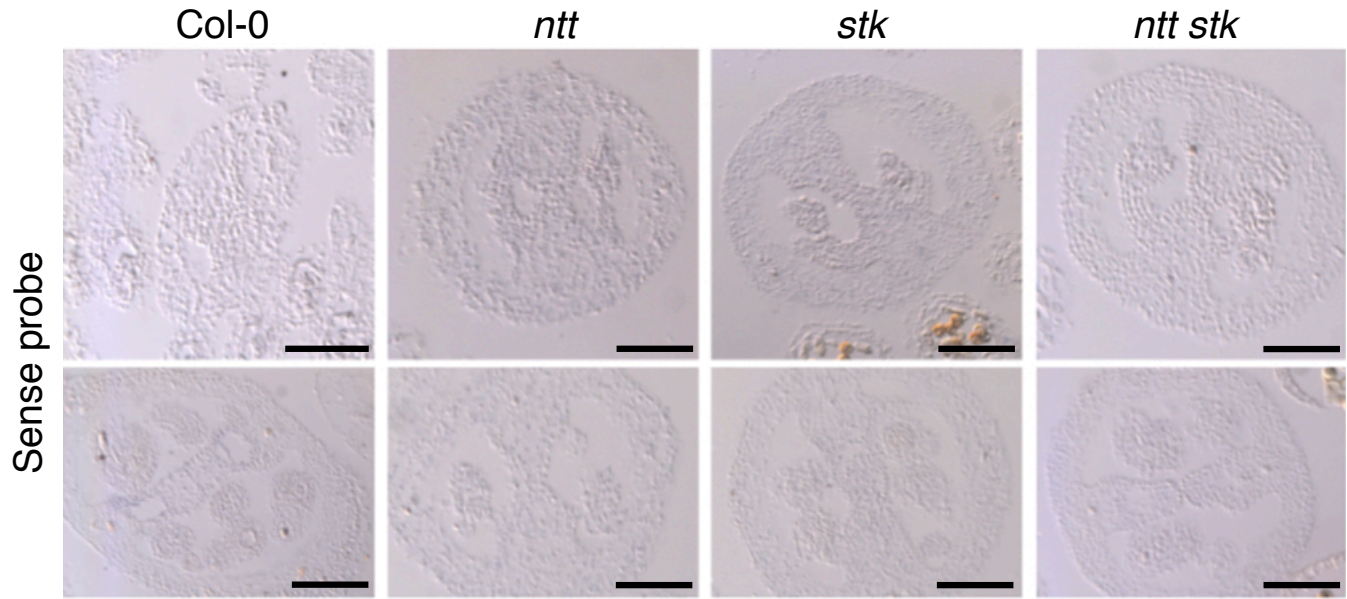

Figure S4: Sense probe controls for the *In situ* hybridization detection of *AT3G26140* (Glycosyl Hydrolase) in the gynoecium. The four genetic backgrounds are shown. Scale bars = 50 μm.



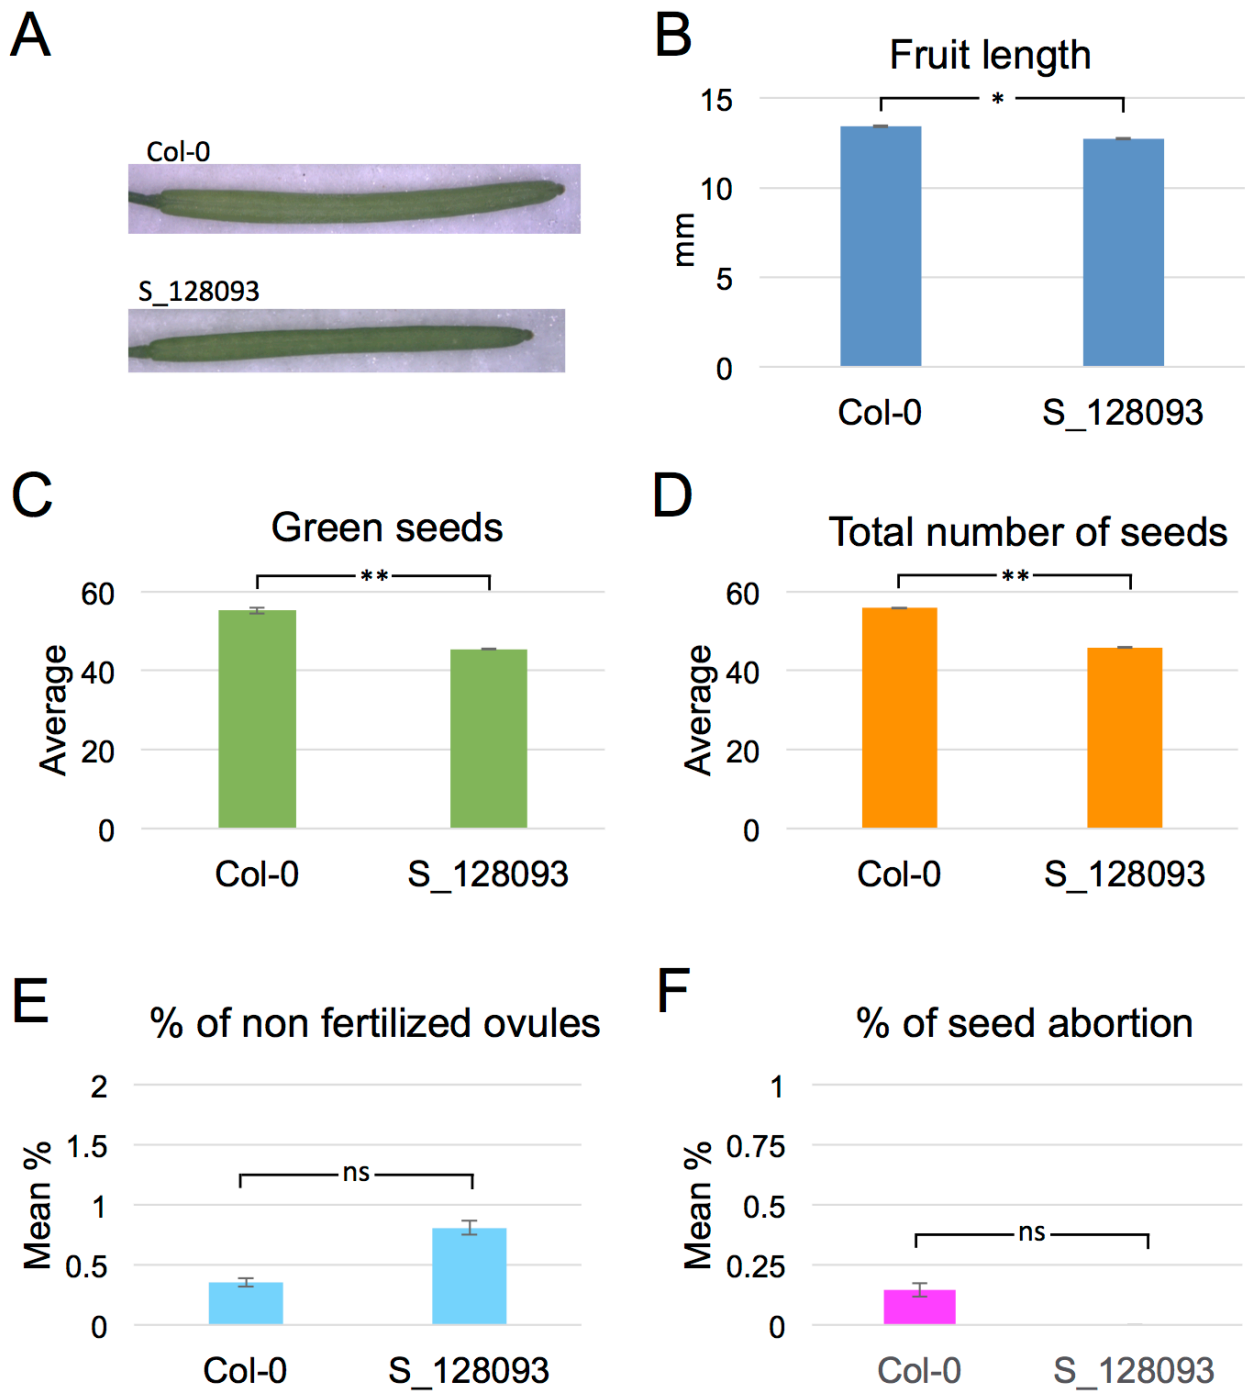

Figure S5. Analysis of At3g26140 (glycosyl hydrolase) insertional line. A, Overview of fruits of Col-0 and S\_128093 line. Analysis of fruit length (B), number of green seeds (C), total number of seeds (D), % of non fertilized ovules (E) and seed abortion (F). Statistical analyses were performed using a T-test,  $p < 0.01$  (\*) or  $p < 0.001$  (\*\*).

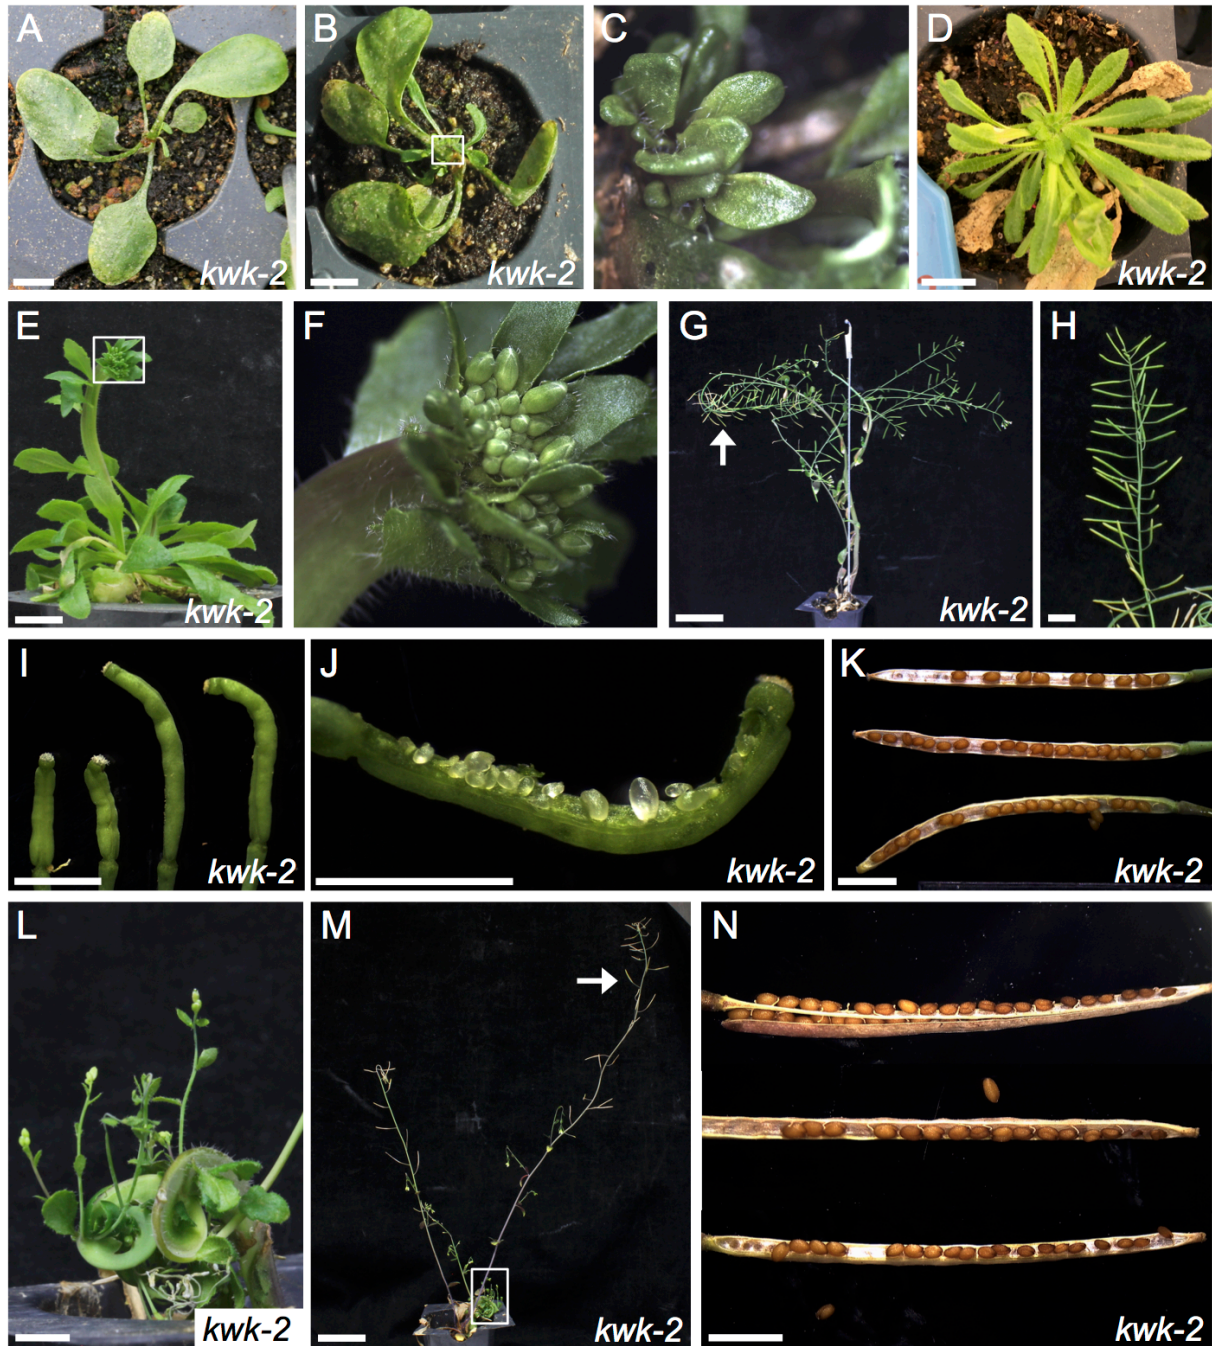

Figure S6. *kwk/abcg15* mutant phenotype in the Col-0 background.

A-N, Examples of *kwk-2* mutant plants severely affected in development. Young plant (A) affected in SAM development, producing few leaves (B), lateral growth is observed in older plant (D), C is a close-up of boxed region in B. E-F, The main inflorescence is affected producing abnormal fruits (I) with severe defects in ovule development (J). Secondary inflorescences seem to grow normally (G). H, a close-up of shoot marked in G with an arrow, the seed-set and development of these fruits (K) is similar to WT, but phyllotaxis is affected. L,M, Another plant with similar phenotypes, main shoot is severely affected (L is a close-up of boxed region in M). Secondary shoots (arrow in M) produce normal fruits (N). Scale bars = 1 cm in A-E and H; 5 cm in G and M; and 2 mm in I-K and N.



Figure S7. ARACNe-based coexpression network.

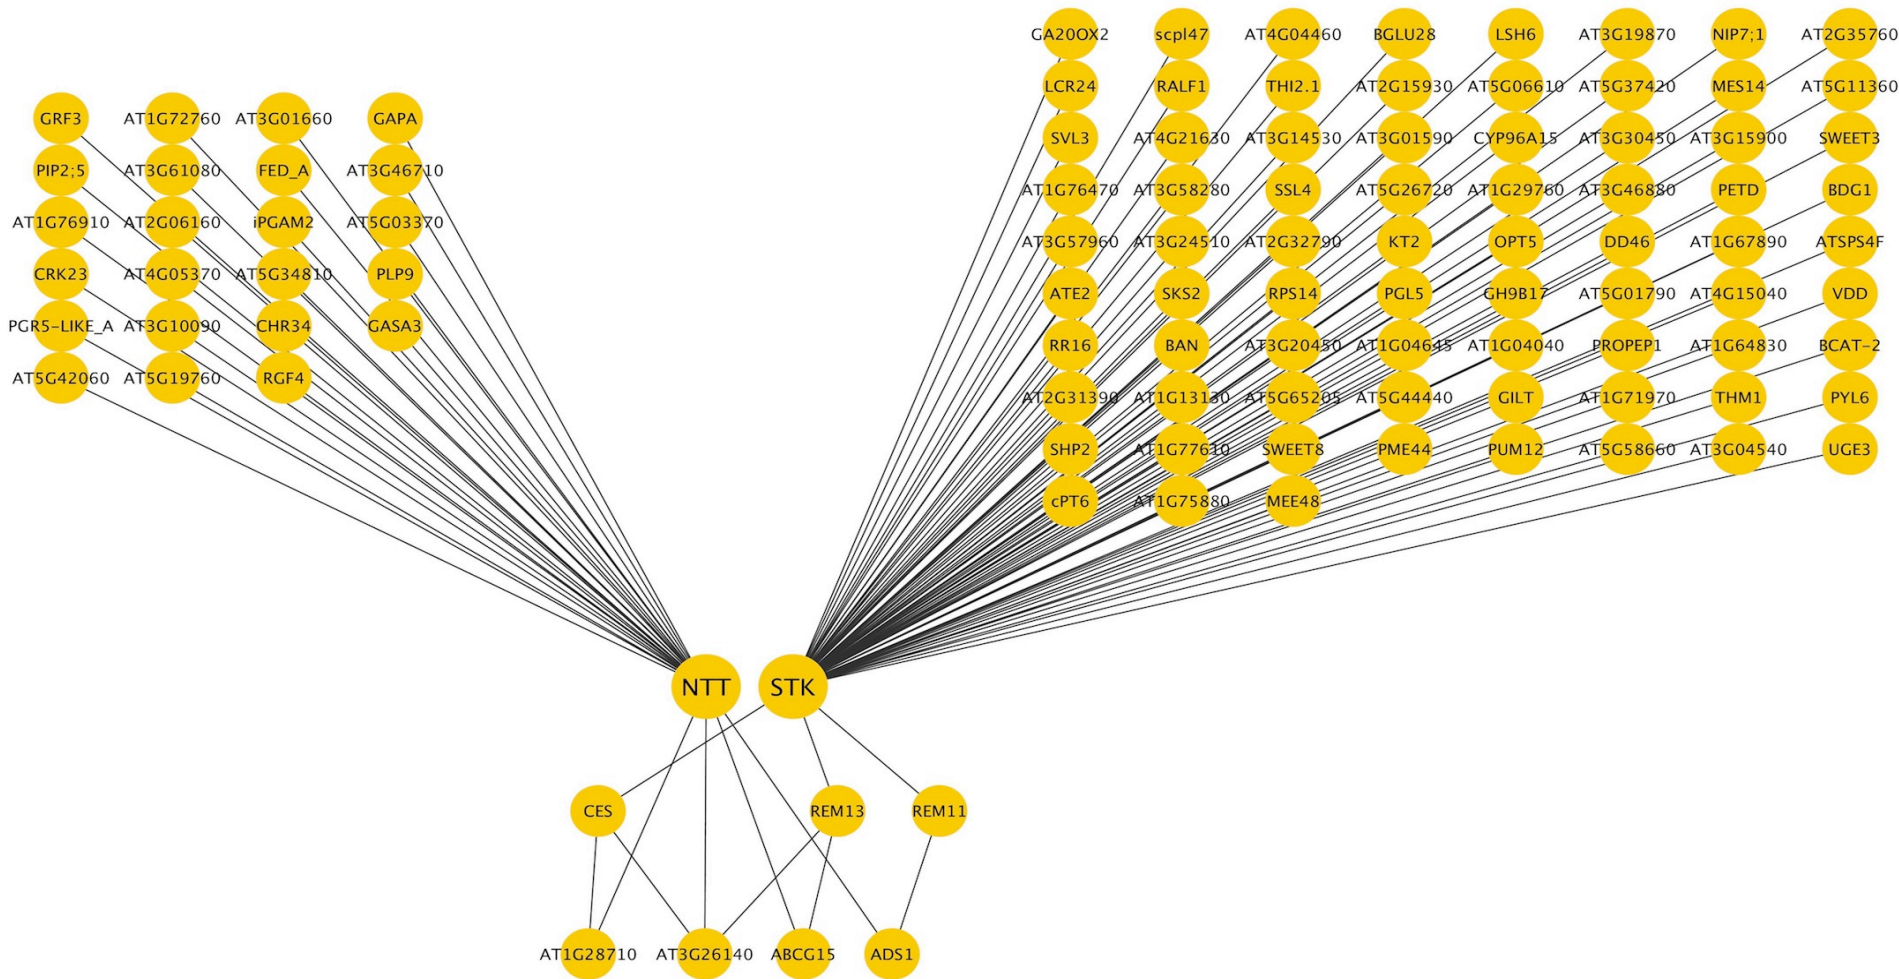

Table S1. Results of tested interactions in the Y2H assays.

The + simbol indicates yeast growth and blue intensity in LacZ assays.

- indicates no growth or no staining.

| BD clone<br>(AG ID) | BD clone<br>(alias) | AD clone<br>(AG ID) | AD clone<br>(alias) | Selection medium 1 |      | Selection medium 2 |      |
|---------------------|---------------------|---------------------|---------------------|--------------------|------|--------------------|------|
|                     |                     |                     |                     | SD-ADE             | LacZ | SD-HIS             | LacZ |
| AT3G57670           | NTT                 | AT1G77850           | ARF17               | +++                | +++  | +++                | +++  |
| AT3G57670           | NTT                 | AT4G29080           | IAA27               | +++                | +++  | +++                | +++  |
| AT3G57670           | NTT                 | AT3G57670           | NTT                 | +++                | +++  | +++                | +++  |
| AT3G57670           | NTT                 | AT4G00870           | bHLH14              | +++                | +++  | +++                | +    |
| AT3G57670           | NTT                 | AT4G18960           | AG                  | +++                | -    | +++                | +++  |
| AT3G57670           | NTT                 | AT1G31140           | GOA                 | +++                | -    | +++                | +++  |
| AT3G57670           | NTT                 | AT4G09960           | STK                 | +++                | -    | +++                | +++  |
| AT3G57670           | NTT                 | AT4G37750           | ANT                 | +                  | +    | +++                | +++  |
| AT3G57670           | NTT                 | AT2G37630           | AS1                 | +                  | +    | +++                | +++  |
| AT3G57670           | NTT                 | AT2G21230           | DKM                 | +                  | +    | +++                | +++  |
| AT3G57670           | NTT                 | AT1G19220           | ARF19               | +++                | +++  | -                  | -    |
| AT3G57670           | NTT                 | AT5G37020           | ARF8                | -                  | -    | +++                | +++  |
| AT3G57670           | NTT                 | AT4G17460           | JAB                 | +++                | +++  | -                  | -    |
| AT3G57670           | NTT                 | AT1G70510           | KNAT2               | +++                | +++  | -                  | -    |
| AT3G57670           | NTT                 | AT2G46870           | NGA1                | +++                | +++  | -                  | -    |
| AT3G57670           | NTT                 | AT1G24260           | SEP3                | -                  | -    | +++                | +++  |
| AT3G57670           | NTT                 | AT2G27990           | PNF                 | -                  | -    | +++                | +    |
| AT3G57670           | NTT                 | AT1G59750           | ARF1                | -                  | -    | +++                | +    |
| AT3G57670           | NTT                 | AT5G41410           | BEL1                | -                  | -    | +++                | +    |
| AT3G57670           | NTT                 | AT3G61970           | NGA2                | -                  | -    | +                  | +    |
| AT3G57670           | NTT                 | AT2G45190           | FIL                 | +++                | +    | -                  | -    |
| AT3G57670           | NTT                 | AT5G60450           | ARF4                | +                  | +    | -                  | -    |
| AT3G57670           | NTT                 | AT3G15170           | CUC1                | +                  | +    | -                  | -    |
| AT3G57670           | NTT                 | AT5G16560           | KAN                 | +                  | +    | -                  | -    |
| AT3G57670           | NTT                 | AT3G51060           | STY1                | +                  | +    | -                  | -    |
| AT3G57670           | NTT                 | AT3G50330           | HEC2                | +                  | -    | -                  | -    |
| AT3G57670           | NTT                 | AT3G61830           | ARF18               | -                  | -    | -                  | -    |
| AT3G57670           | NTT                 | AT1G69180           | CRC                 | -                  | -    | -                  | -    |
| AT3G57670           | NTT                 | AT5G53950           | CUC2                | -                  | -    | -                  | -    |
| AT3G57670           | NTT                 | AT2G33860           | ETT                 | -                  | -    | -                  | -    |
| AT3G57670           | NTT                 | AT5G67060           | HEC1                | -                  | -    | -                  | -    |
| AT3G57670           | NTT                 | AT1G23380           | KNAT6               | -                  | -    | -                  | -    |
| AT3G57670           | NTT                 | AT1G01030           | NGA3                | -                  | -    | -                  | -    |
| AT3G57670           | NTT                 | AT1G68640           | PAN                 | -                  | -    | -                  | -    |
| AT3G57670           | NTT                 | AT2G34710           | PHB                 | -                  | -    | -                  | -    |
| AT3G57670           | NTT                 | AT3G54220           | SCR1                | -                  | -    | -                  | -    |
| AT3G57670           | NTT                 | AT4G36260           | STY2                | -                  | -    | -                  | -    |
| AT3G57670           | NTT                 | AT2G17950           | WUS                 | -                  | -    | -                  | -    |
| AT3G57670           | NTT                 | AT4G08150           | BP                  | -                  | -    | -                  | -    |
| AT3G57670           | NTT                 | AT5G02030           | RPL                 | +                  | -    | +++                | +    |
| AT3G57670           | NTT                 | AT1G62360           | STM                 | +++                | +++  | -                  | -    |
| AT3G57670           | NTT                 | AT5G60910           | FUL                 | +++                | -    | +++                | +++  |
| AT3G57670           | NTT                 | AT3G58780           | SHP1                | +++                | -    | +++                | +++  |
| AT3G57670           | NTT                 | AT2G42830           | SHP2                | +++                | -    | +++                | +++  |

\* Reported in Marsch-Martínez, N. *et al.* (2014) *Plant J*, **80**, 69-81.



Table S2. ARACNe-based coexpression network of *NTT* and *STK*.Coexpression network: genes connected to *NO TRANSMITTING TRACT (NTT)*

| <i>AGI ID</i> | <i>GENE ALIAS</i> | <i>BRIEF DESCRIPTION</i>                                                   | <i>SOURCE</i>                |
|---------------|-------------------|----------------------------------------------------------------------------|------------------------------|
| AT3G30350     | RGF4              | uncharacterized protein                                                    | [Source:EMBL;Acc:AEE77635.1] |
| AT5G38480     | GRF3              | 14-3-3-like protein GF14 psi                                               | [Source:EMBL;Acc:AED94323.1] |
| AT3G63200     | PLP9              | PATATIN-like protein 9                                                     | [Source:EMBL;Acc:AEE80447.1] |
| AT3G54820     | PIP2;5            | putative aquaporin PIP2-5                                                  | [Source:EMBL;Acc:AEE79295.1] |
| AT4G09600     | GASA3             | gibberellin-regulated protein 3                                            | [Source:EMBL;Acc:AEE82770.1] |
| AT3G10090     |                   | 40S ribosomal protein S28-1                                                | [Source:EMBL;Acc:AEE74858.1] |
| AT5G42060     |                   | DEK, chromatin associated protein                                          | [Source:EMBL;Acc:AED94761.1] |
| AT5G19760     |                   | Mitochondrial substrate carrier family protein                             | [Source:EMBL;Acc:AED92746.1] |
| AT1G72760     |                   | protein kinase-like protein                                                | [Source:EMBL;Acc:AEE35369.1] |
| AT4G23310     | CRK23             | putative cysteine-rich receptor-like protein kinase 23                     | [Source:EMBL;Acc:AEE84737.1] |
| AT5G03370     |                   | acylphosphatase                                                            | [Source:EMBL;Acc:AED90593.1] |
| AT3G61080     |                   | protein kinase-like protein                                                | [Source:EMBL;Acc:AEE80151.1] |
| AT1G76910     |                   | uncharacterized protein                                                    | [Source:EMBL;Acc:AEE35902.1] |
| AT3G26650     | GAPA              | glyceraldehyde-3-phosphate dehydrogenase A                                 | [Source:EMBL;Acc:AEE77191.1] |
| AT2G21450     | CHR34             | chromatin remodeling 34                                                    | [Source:EMBL;Acc:AEC07179.1] |
| AT3G01660     |                   | S-adenosylmethionine-dependent methyltransferase domain-containing protein | [Source:EMBL;Acc:AEE73700.1] |
| AT4G05370     |                   | BCS1 AAA-type ATPase                                                       | [Source:EMBL;Acc:AEE82510.1] |
| AT3G46710     |                   | putative disease resistance RPP13-like protein 2                           | [Source:EMBL;Acc:AEE78196.1] |
| AT4G22890     | PGR5-LIKE_A       | Transmembrane protein present in thylakoids                                | [Source:EMBL;Acc:AEE84674.1] |
| AT3G08590     | iPGAM2            | 2,3-biphosphoglycerate-independent phosphoglycerate mutase 2               | [Source:EMBL;Acc:AEE74651.1] |

Coexpression network: genes connected to *SEEDSTICK* (*STK*) (page 1)

| AGI ID    | GENE ALIAS    | BRIEF DESCRIPTION                                           | SOURCE                       |
|-----------|---------------|-------------------------------------------------------------|------------------------------|
| AT2G42830 | SHP2          | agamous-like MADS-box protein AGL5                          | [Source:EMBL;Acc:AEC10174.1] |
| AT5G18000 | VDD           | VERDANDI protein                                            | [Source:EMBL;Acc:AED92494.1] |
| AT1G61720 | BAN           | anthocyanidin reductase                                     | [Source:EMBL;Acc:AEE33879.1] |
| AT2G40670 | ARR16 (RR16)  | two-component response regulator ARR16                      | [Source:EMBL;Acc:AEC09862.1] |
| AT5G22980 | scpl47        | carboxypeptidase                                            | [Source:EMBL;Acc:AED93104.1] |
| AT1G04040 |               | HAD superfamily, subfamily IIIB acid phosphatase            | [Source:EMBL;Acc:AEE27649.1] |
| AT1G72260 | THI2.1        | thionin 2.1                                                 | [Source:EMBL;Acc:AEE35295.1] |
| AT1G77610 |               | EamA-like transporter                                       | [Source:EMBL;Acc:AEE36000.1] |
| AT2G15930 |               | uncharacterized protein                                     | [Source:EMBL;Acc:AEC06449.1] |
| AT1G13130 |               | Cellulase (glycosyl hydrolase family 5) protein             | [Source:EMBL;Acc:AEE28973.1] |
| AT4G26590 | ATOPT5 (OPT5) | oligopeptide transporter 5                                  | [Source:EMBL;Acc:AEE85224.1] |
| AT5G24420 | PGL5          | 6-phosphogluconolactonase 5                                 | [Source:EMBL;Acc:AED93309.1] |
| AT3G20450 |               | B-cell receptor-associated protein 31-like protein          | [Source:EMBL;Acc:AEE76381.1] |
| AT4G33220 | PME44         | pectinesterase 44                                           | [Source:EMBL;Acc:AEE86192.1] |
| AT1G10070 | BCAT-2        | branched-chain-amino-acid aminotransferase 2                | [Source:EMBL;Acc:AEE28539.1] |
| AT5G58660 |               | oxidoreductase, 2OG-Fe(II) oxygenase family protein         | [Source:EMBL;Acc:AED97082.1] |
| AT2G32790 |               | ubiquitin-conjugating enzyme E2 D/E                         | [Source:EMBL;Acc:AEC08742.1] |
| AT3G58280 |               | phospholipase-like protein (PEARL1 4) with TRAF-like domain | [Source:EMBL;Acc:AEE79763.1] |
| AT1G07090 | LSH6          | uncharacterized protein                                     | [Source:EMBL;Acc:AEE28076.1] |
| AT1G64830 |               | aspartyl protease-like protein                              | [Source:EMBL;Acc:AEE34295.1] |
| AT2G31390 |               | fructokinase                                                | [Source:EMBL;Acc:AEC08541.1] |
| AT3G11240 | ATE2          | arginine-tRNA protein transferase 2                         | [Source:EMBL;Acc:AEE75019.1] |
| AT5G65205 |               | Rossmann-fold NAD(P)-binding domain-containing protein      | [Source:EMBL;Acc:AED98017.1] |
| AT5G37420 |               | uncharacterized protein                                     | [Source:EMBL;Acc:AED94186.1] |
| AT3G04540 |               | defensin-like protein 44                                    | [Source:EMBL;Acc:AEE74094.1] |
| AT2G44460 | BGLU28        | beta glucosidase 28                                         | [Source:EMBL;Acc:AEC10422.1] |



Coexpression network: genes connected to *SEEDSTICK* (page 2)

| AGI ID    | ALIAS          | BRIEF DESCRIPTION                                                           | SOURCE                       |
|-----------|----------------|-----------------------------------------------------------------------------|------------------------------|
| AT5G01790 |                | uncharacterized protein                                                     | [Source:EMBL;Acc:AED90392.1] |
| AT1G29760 |                | Putative adipose-regulatory protein (Seipin)                                | [Source:EMBL;Acc:AEE31126.1] |
| AT4G12960 | GILT           | Gamma interferon responsive lysosomal thiol (GILT) reductase family protein | [Source:EMBL;Acc:AEE83207.1] |
| AT4G14080 | MEE48          | putative glucan endo-1,3-beta-glucosidase A6                                | [Source:EMBL;Acc:AEE83368.1] |
| AT3G19870 |                | uncharacterized protein                                                     | [Source:EMBL;Acc:AEE76302.1] |
| AT1G33990 | ATMES14        | methyl esterase 14                                                          | [Source:EMBL;Acc:AEE31655.1] |
| AT1G03680 | ATHM1 (THM1)   | thioredoxin M1                                                              | [Source:EMBL;Acc:AEE27596.1] |
| AT5G56510 | APUM12 (PUM12) | pumilio 12                                                                  | [Source:EMBL;Acc:AED96775.1] |
| AT4G15040 |                | Subtilisin-like serine endopeptidase family protein                         | [Source:EMBL;Acc:AEE83544.1] |
| AT3G20520 | SVL3           | protein SEUSS-like 3                                                        | [Source:EMBL;Acc:AEE76390.1] |
| AT3G57960 |                | Emsy N Terminus (ENT) domain-containing protein                             | [Source:EMBL;Acc:AEE79724.1] |
| AT1G71970 |                | uncharacterized protein                                                     | [Source:EMBL;Acc:AEE35259.1] |
| AT2G40330 | PYL6           | abscisic acid receptor PYL6                                                 | [Source:EMBL;Acc:AEC09815.1] |
| AT5G51810 | GA20OX2        | gibberellin 20 oxidase 2                                                    | [Source:EMBL;Acc:AED96129.1] |
| AT4G29285 | LCR24          | defensin-like protein 163                                                   | [Source:EMBL;Acc:AEE85613.1] |
| AT5G44440 |                | FAD-binding and BBE domain-containing protein                               | [Source:EMBL;Acc:AED95109.1] |
| AT5G11360 |                | Interleukin-1 receptor-associated kinase 4 protein                          | [Source:EMBL;Acc:AED91665.1] |
| AT3G14530 |                | geranylgeranyl diphosphate synthase 9                                       | [Source:EMBL;Acc:AEE75535.1] |
| AT5G53190 | SWEET3         | Nodulin MtN3 family protein                                                 | [Source:EMBL;Acc:AED96320.1] |
| AT2G34520 | RPS14          | small subunit ribosomal protein S14                                         | [Source:EMBL;Acc:AEC08984.1] |
| ATC00730  | PETD           | photosynthetic electron transfer D                                          | [Source:TAIR;Acc:ATCG00730]  |
| AT3G46880 |                | uncharacterized protein                                                     | [Source:EMBL;Acc:AEE78214.1] |
| AT3G24510 |                | defensin-like protein 259                                                   | [Source:EMBL;Acc:AEE76910.1] |
| AT5G40260 | SWEET8         | protein RUPTURED POLLEN GRAIN 1                                             | [Source:EMBL;Acc:AED94527.1] |
| AT5G26720 |                | uncharacterized protein                                                     | [Source:EMBL;Acc:AED93572.1] |

Coexpression network: genes connected to *SEEDSTICK* (page 3)

| AGI ID    | ALIAS      | BRIEF DESCRIPTION                                       | SOURCE                       |
|-----------|------------|---------------------------------------------------------|------------------------------|
| AT1G76470 |            | Rossmann-fold NAD(P)-binding domain-containing protein  | [Source:EMBL;Acc:AEE35846.1] |
| AT3G15900 |            | uncharacterized protein                                 | [Source:EMBL;Acc:AEE75744.1] |
| AT1G75880 |            | GDSL esterase/lipase EXL1                               | [Source:EMBL;Acc:AEE35769.1] |
| AT4G10120 | ATSPS4F    | sucrose-phosphate synthase                              | [Source:EMBL;Acc:AEE82845.1] |
| AT1G63180 | UGE3       | UDP-glucose 4-epimerase                                 | [Source:EMBL;Acc:AEE34065.1] |
| AT4G21630 |            | Subtilase family protein                                | [Source:EMBL;Acc:AEE84483.1] |
| AT1G67890 |            | PAS domain-containing protein tyrosine kinase           | [Source:EMBL;Acc:AEE34716.1] |
| AT3G51420 | SSL4       | strictosidine synthase-like 4 protein                   | [Source:EMBL;Acc:AEE78790.1] |
| AT5G51480 | SKS2       | Monocopper oxidase-like protein SKS2                    | [Source:EMBL;Acc:AED96089.1] |
| AT1G02900 | ATRALF1    | rapid alkalization factor 1                             | [Source:EMBL;Acc:AEE27494.1] |
| AT4G04460 |            | phytepsin                                               | [Source:EMBL;Acc:AEE82391.1] |
| AT1G57750 | MAH1       | cytochrome P450, family 96, subfamily A, polypeptide 15 | [Source:EMBL;Acc:AEE33459.1] |
| AT3G01590 |            | glucose-6-phosphate 1-epimerase                         | [Source:EMBL;Acc:AEE73693.1] |
| AT2G35760 |            | uncharacterized protein                                 | [Source:EMBL;Acc:AEC09157.1] |
| AT1G04645 |            | self-incompatibility protein S1-like protein            | [Source:EMBL;Acc:AEE27728.1] |
| AT2G40540 | TRK2 (KT2) | potassium transporter 2                                 | [Source:EMBL;Acc:AEC09846.1] |
| AT5G06610 |            | uncharacterized protein                                 | [Source:EMBL;Acc:AED91042.1] |
| AT5G64900 | PROPEP1    | elicitor peptide 1                                      | [Source:EMBL;Acc:AED97966.1] |
| AT1G64670 | BDG1       | alpha/beta-hydrolase domain-containing protein          | [Source:EMBL;Acc:AEE34272.1] |
| AT4G39000 | GH9B17     | endoglucanase 23                                        | [Source:EMBL;Acc:AEE87006.1] |
| AT1G22015 | DD46       | putative beta-1,3-galactosyltransferase 5               | [Source:EMBL;Acc:AEE30185.1] |



## Coexpression network core

| <i>AGI ID</i> | <i>GENE ALIAS</i> | <i>BRIEF DESCRIPTION</i>                                         | <i>SOURCE</i>                |
|---------------|-------------------|------------------------------------------------------------------|------------------------------|
| AT1G06080     | ADS1              | delta-9 acyl-lipid desaturase 1                                  | [Source:EMBL;Acc:AEE27937.1] |
| AT1G28710     |                   | nucleotide-diphospho-sugar transferase domain-containing protein | [Source:EMBL;Acc:AEE31018.1] |
| AT3G26140     |                   | Cellulase (glycosyl hydrolase family 5) protein                  | [Source:EMBL;Acc:AEE77125.1] |
| AT5G60140     | REM11             | AP2/B3 domain-containing transcription factor                    | [Source:EMBL;Acc:AED97284.1] |
| AT3G46770     | REM13             | AP2/B3 domain-containing transcription factor                    | [Source:EMBL;Acc:AEE78203.1] |
| AT1G25330     | HAF/CES           | Transcription factor bHLH75                                      | [Source:EMBL;Acc:AEE30607.1] |
| AT3G21090     | ABCG15            | ABC transporter G family member 15                               | [Source:EMBL;Acc:AAM13053.1] |

Table S3. Primer list.

| GENE ALIAS                                    | GENE ID   | EXPERIMENT           | PRIMER NAME                    | SEQUENCE                            | FRAGMENT LENGTH (bp) |
|-----------------------------------------------|-----------|----------------------|--------------------------------|-------------------------------------|----------------------|
| <i>Glycosyl Hydrolase</i>                     | AT3G26140 | ChIP-qPCR            | RT 1982 (FW carg3)             | CGTGTTTGATTGAATACACCACCCT           | 172                  |
|                                               |           |                      | RT 1983 (REV carg3)            | AACAAATCCTATGTTACTCAATCATAGCTT      |                      |
|                                               |           |                      | RT 2631 (FW NTT-binding site)  | AGAGCTAAGACGCATGTTTTGC              | 136                  |
|                                               |           |                      | RT 2632 (FW NTT-binding site)  | ACACGCCAGCTTCACTCTTT                |                      |
|                                               |           | qRT-PCR              | SdF1027                        | GTCCGATCACGACACGTAAA                | 198                  |
|                                               |           |                      | SdF1028                        | GTCGATTCCAAACTCGCTAAGA              |                      |
| <i>ABCG15</i>                                 | AT3G21090 | ChIP-qPCR            | SdF632 (At3g26140_probe_FW)    | CACCCTTAGATCCAACCAAGGTC             | 193                  |
|                                               |           |                      | SdF633 (At3g26140_probe_REV)   | GAGGCTGAGATGGTCTCCCC                |                      |
|                                               |           | qRT-PCR              | RT 2070 (FW cargos 10-11)      | CTTGTGGCTTGTCACTTGTGG               | 106                  |
|                                               |           |                      | RT 2071 (REV cargos 10-11)     | ATCTTTGACCTTTGCACCACT               |                      |
|                                               |           |                      | RT 2627 (FW NTT-binding site)  | GACTTGCTTCAATTTTAGTGGCT             | 159                  |
|                                               |           |                      | RT 2628 (REV NTT-binding site) | TCGTCGGACAAAACTCTAAACTC             |                      |
| <i>ADS1</i>                                   | AT1G06080 | ChIP-qPCR            | SdF1029                        | AGATGAGCCGTGGAGCGTAT                | 100                  |
|                                               |           |                      | SdF1030                        | CCGTTTAGCCTTTGGAGCAA                |                      |
|                                               |           | qRT-PCR              | RT 2072 (FW cargos 3-4)        | AGGATGAGGTATCGATGGTTGC              | 124                  |
|                                               |           |                      | RT 2073 (REV cargos 3-4)       | TGTATGTGGTGGACCAAGCA                |                      |
|                                               |           |                      | RT 2633 (FW NTT-binding site)  | CCGTTAGGTTTTGGTCACAGTC              | 163                  |
|                                               |           |                      | RT 2634 (REV NTT-binding site) | TTTACGGGTGGGTCCTCCAT                |                      |
| <i>Nucleotide-diphospho-sugar transferase</i> | AT1G28710 | ChIP-qPCR            | SdF1023                        | TGTCCATTTCTCTGTCTCTTG               | 269                  |
|                                               |           |                      | SdF1024                        | TAGGACTATGTGGGTCCCTATC              |                      |
|                                               |           | qRT-PCR              | RT 2130 (FW cargos 4-7)        | TGGTGTTACATCCAAATCCGGT              | 156                  |
|                                               |           |                      | RT 2131 (REV cargos 4-7)       | CGCAAAGAGAAGAGCAACGG                |                      |
|                                               |           |                      | RT 2629 (FW NTT-binding site)  | AATCGAACTGGGTCATCGACTT              | 134                  |
|                                               |           |                      | RT 2630 (REV NTT-binding site) | TCGGAATGCCCTTTGACTT                 |                      |
| <i>ACTIN2</i>                                 |           | qRT-PCR              | SdF1033                        | CCGCGGCTACAATCTTACTT                | 210                  |
|                                               |           |                      | SdF1034                        | AGCCTCATGTGCTACCATTTTC              |                      |
| <i>ACTIN7</i>                                 | AT5G09810 | ChIP-qPCR            | SdF1161                        | AATCACAGCACTTGCACC                  | 100                  |
|                                               |           |                      | SdF1162                        | ATTCTTGACCTGCCTC                    |                      |
| <i>NTT</i>                                    | AT5G09810 | ChIP-qPCR            | RT_045 (FW act7)               | CGTTTCGCTTTCTTAGTGTTAGCT            | 132                  |
|                                               |           |                      | RT_046 (REV act7)              | AGCGAACGGATCTAGAGACTCACCTTG         |                      |
| <i>NTT</i>                                    | AT3G57670 | <i>NTT::GUS</i> line | S314                           | ATAATCGATCCGTGGAGCCAATATAGGTCGAAC   | 1216                 |
|                                               |           |                      | S318                           | TCTCCATGGTGAAGAGAGAGAGAGGAAGAGAAAGG |                      |
